# Supplementary material for: Preclinical validation of a live attenuated dermotropic Leishmania vaccine against vector transmitted fatal visceral leishmaniasis
Source: PubMed Central journal article supplement (PMC8324786; doi:10.1038/s42003-021-02446-x), 2021-07-30
Supplement: 42003_2021_2446_MOESM2_ESM.pdf [file 42003_2021_2446_MOESM2_ESM.pdf]

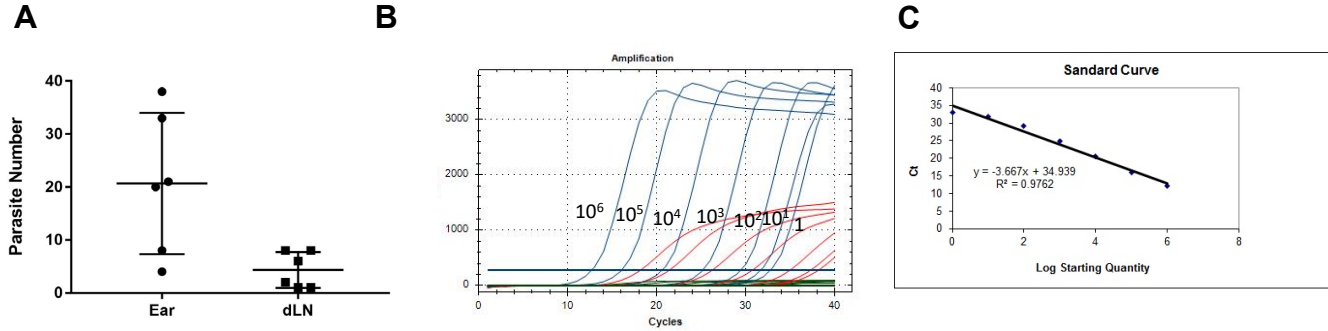

**Supplementary Figure 1: Determination of parasite load by RT-PCR at 49-days of post-injection :**

(A-C) Ear and dLN parasite burden of *LmCen*<sup>-/-</sup> immunized hamsters (n=6) at 49 days of post inoculation was determined by RT-PCR (A). Amplification of *L. major* parasites from DNA co-extracted after spiking hamster ears with known numbers of parasites (B). The parasite burden in the ear and dLN samples from *LmCen*<sup>-/-</sup> group was quantified by generating a standard curve of the cycle number (Ct) that corresponds to the number of spiked *L. major* parasites (C).

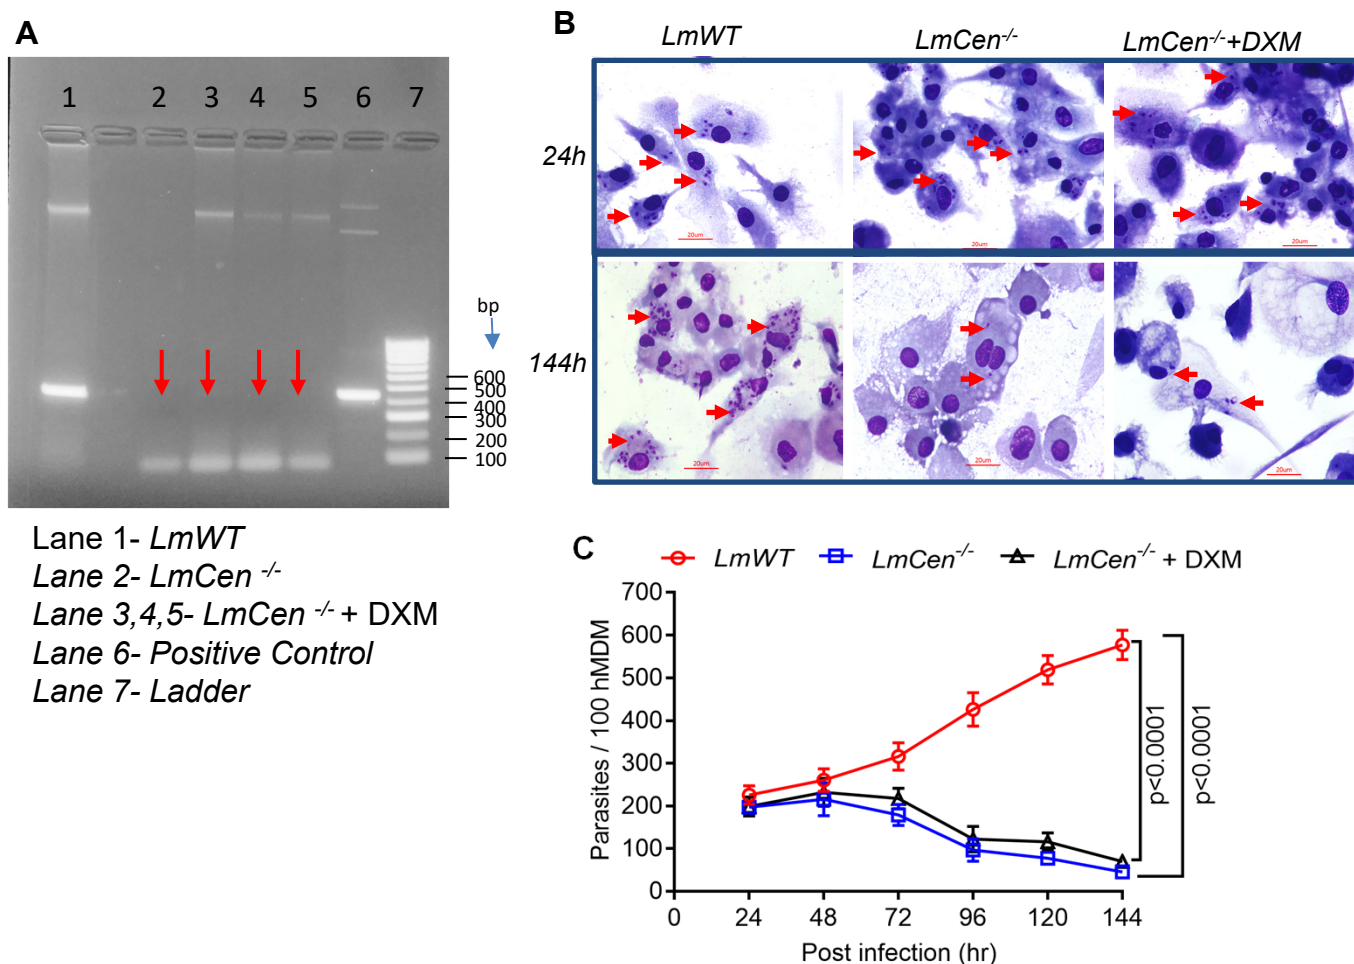

**Supplementary Figure 2. *LmCen*<sup>-/-</sup> does not cause any lesions even in immune suppressed animals**  
 (A) 1% Agarose gel electrophoresis results for the characterization of *LmCen*<sup>-/-</sup> parasites isolated from *LmCen*<sup>-/-</sup> plus DXM treated group using *L. major centrin* gene specific primers. Lane-1, PCR results from the genomic DNA of parasites isolated from *LmWT*, Lane-2, PCR results from the genomic DNA of <sub>2</sub> parasites isolated from *LmCen*<sup>-/-</sup> treated group, Lane-3,4,5 PCR results from the genomic DNA of parasites isolated from *LmCen*<sup>-/-</sup> + DXM treated group, Lane-6 PCR results from the plasmid DNA containing *centrin* gene as a positive control . Lane 4 , 100 bp DNA ladder (Bioline). Red arrow indicates the absence of main product bands (*centrin* gene) of 450bp in Lane-2,3,4 and 5. (B and C) Photographs (B) of human monocyte derived macrophages (hMDM) at 24h and 144h post-infection with parasites isolated from *LmCen*<sup>-/-</sup> plus DXM treated group as well as *LmWT* and *LmCen*<sup>-/-</sup> parasites respectively. The number of amastigotes (red arrow) was determined microscopically up to 144h post infection. The data (Mean ± SD) are represented as the number of parasites per 100 hMDM (C) of one independent experiment (p values were determined by Unpaired two-tailed t test).

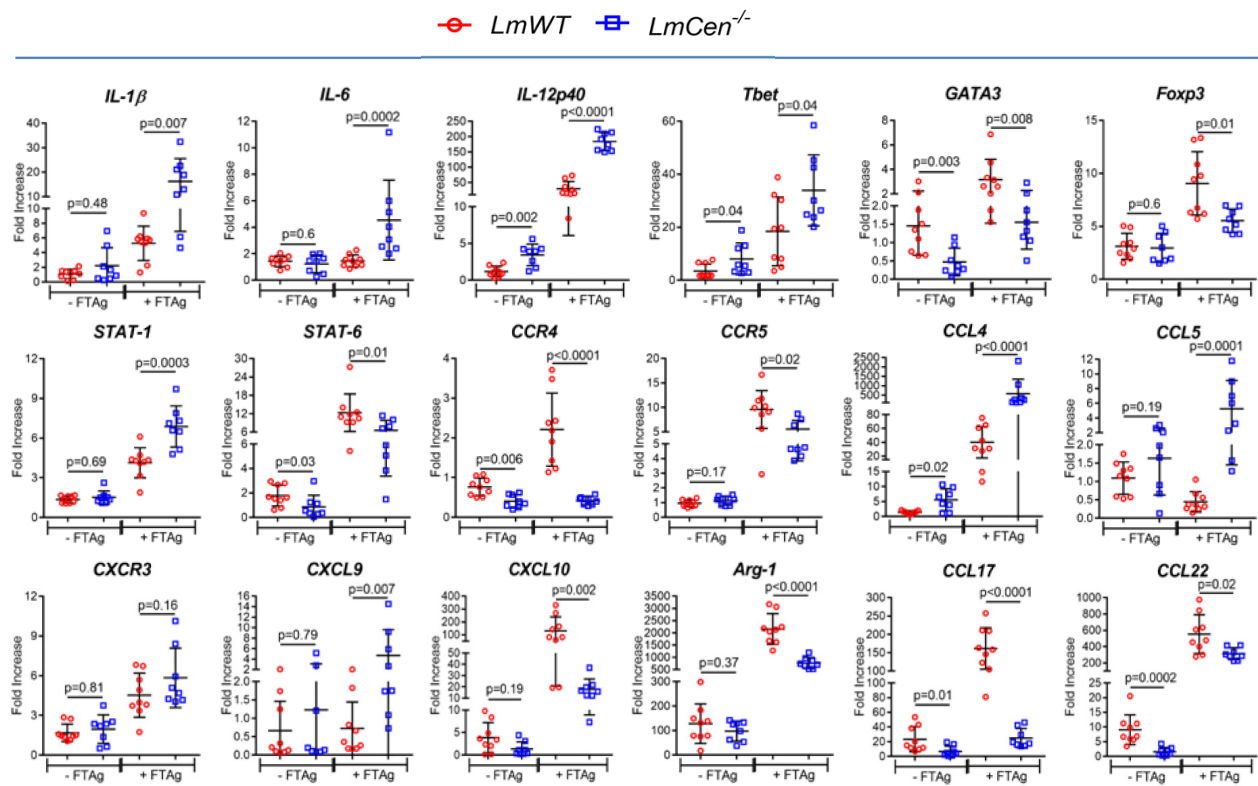

### Supplementary Figure 3. *LmCen<sup>-/-</sup>* immunization induces pro-inflammatory immune response.

The expression of transcripts (*IL-1β*, *IL-6*, *IL-12p40*, *Tbet*, *GATA3*, *Foxp3*, *STAT-1*, *STAT-6*, *CCR4*, *CCR5*, *CCL4*, *CCL5*, *CXCR3*, *CXCL9*, *CXCL10*, *Arg-1*, *CCL17* and *CCL22*) was confirmed by RT-PCR in the spleen (with or with-out 24h of *L. major* freeze thaw antigen re-stimulation; ± FTA<sub>g</sub>) of hamsters immunized with *LmCen<sup>-/-</sup>* parasites (n=8) and compared with *LmWT* (n=9) infected group following 7 weeks of post inoculation. The data were normalized to either  $\gamma$ -Actin or 18S expression. Results (mean  $\pm$  SD) are representative of cumulative effect of two independent experiments. Statistical analysis was performed by non-parametric Mann-Whitney two-tailed test.

A

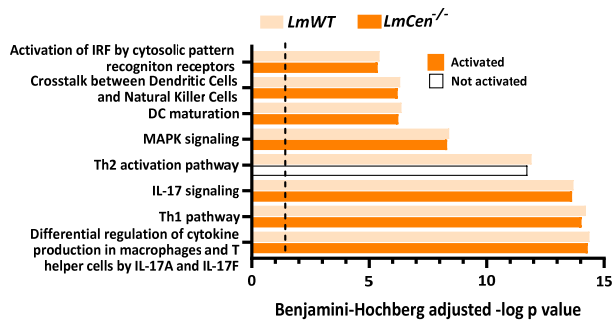

B

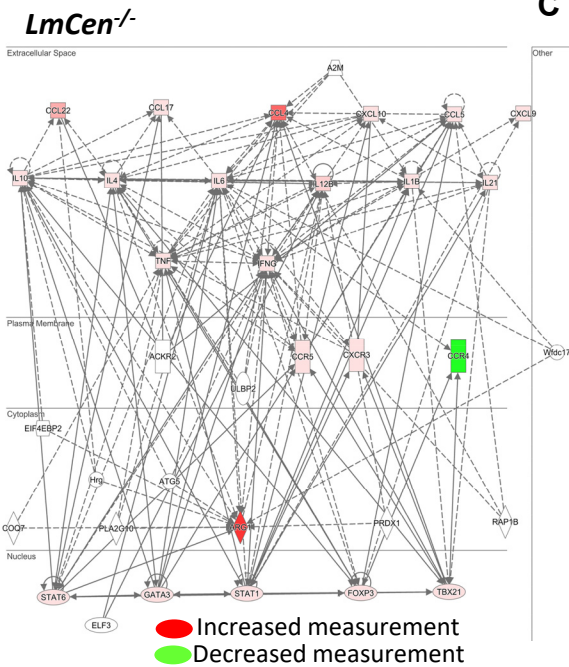

C

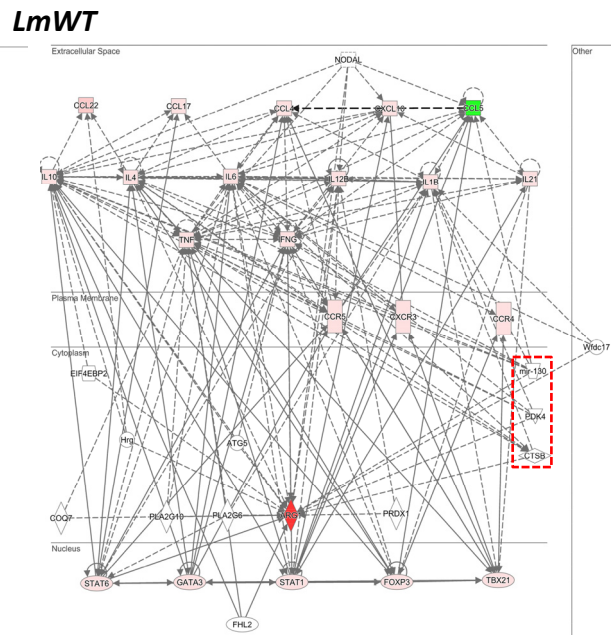

### Supplementary Figure 4: Immunogenicity of *LmCen*<sup>-/-</sup> parasites in hamsters

A, Ingenuity pathway analysis comparing the expression of various Th1/Th2 associated immune markers showing common canonical pathways activated in *LmWT* or *LmCen*<sup>-/-</sup> infections. B and C. Immune signaling networks observed in *LmCen*<sup>-/-</sup> (B) and *LmWT* (C) infections show differential expression of immune markers in two infections. The pink, green and red color indicates experimentally measured markers and colorless nodes represent IPA predictions. Datasets from RT-PCR experiments represented in Supplementary Figure 3 were used in the IPA analysis.

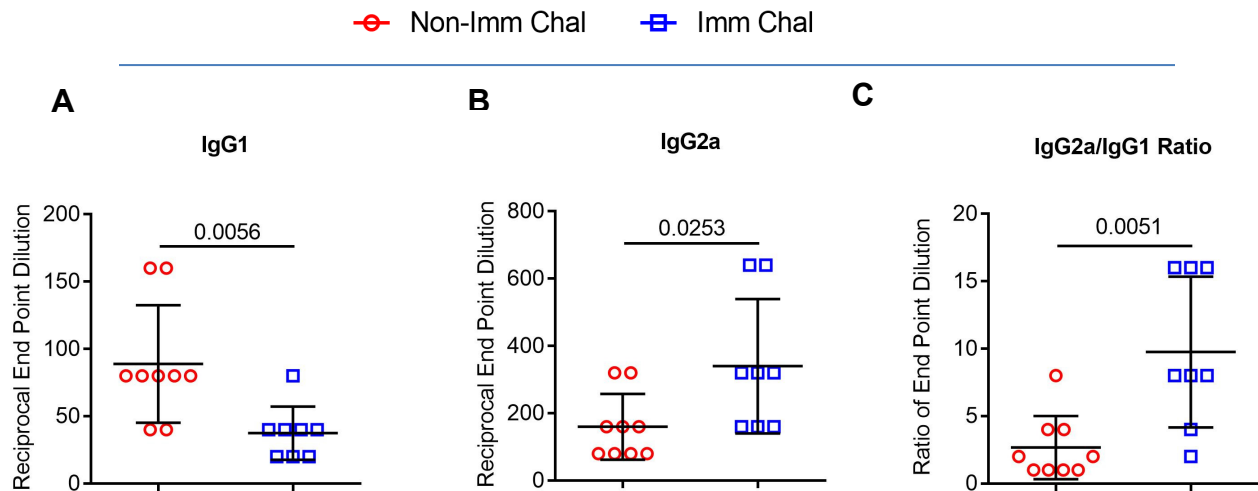

**Supplementary Figure 5. *LmCen*<sup>-/-</sup> immunization induces IgG2a type of immune response.**

**A, B,** Anti-leishmanial IgG1 (A) and IgG2a (B) were measured from the serum of hamsters immunized with *LmCen*<sup>-/-</sup> parasites (n=8) and compared with *LmWT* (n=9) infected group following 7 weeks of post inoculation. (C) The ratio of IgG2a/IgG1. Results (mean ± SD) are representative of cumulative effect of two independent experiments. Statistical analysis was performed by non-parametric Mann-Whitney two-tailed test.

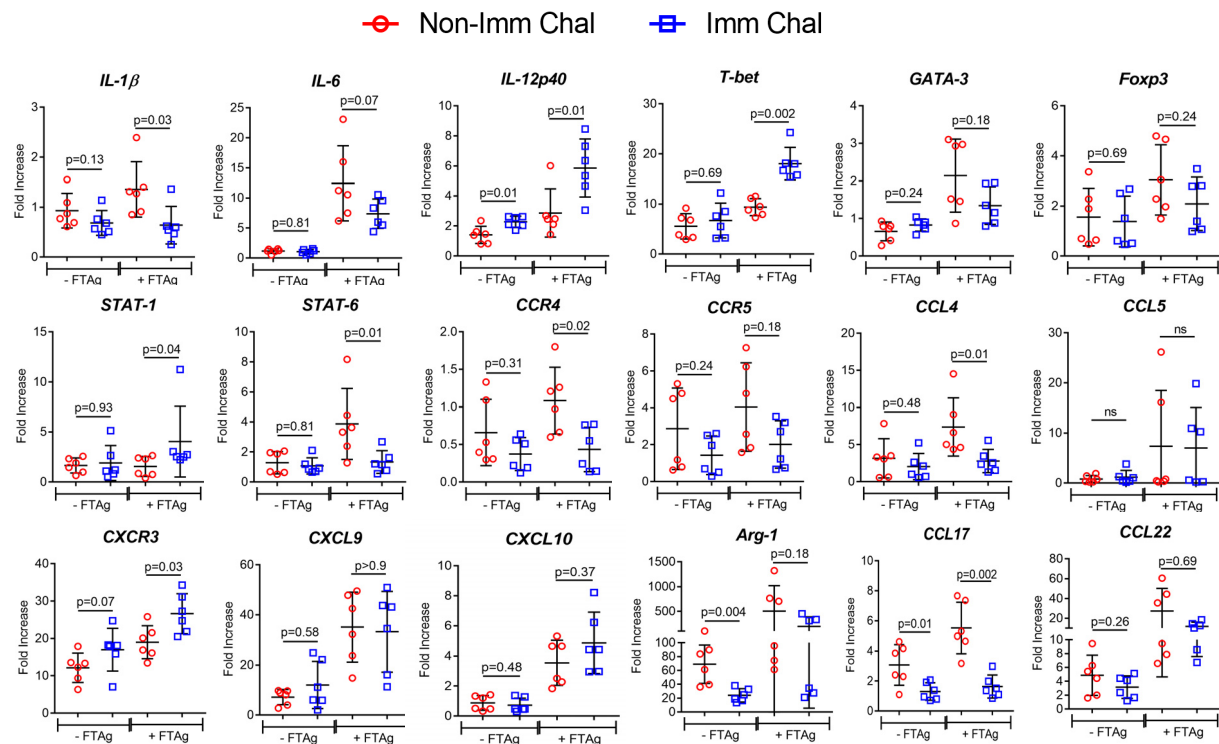

**Supplementary Figure 6. *LmCen*<sup>-/-</sup> immunized hamster induces pro-inflammatory type of immune response upon challenge with wild type *L. donovani*.**

The expression of transcripts (IL-1 $\beta$ , IL-6, IL-12p40, T-bet, GATA3, Foxp3, STAT-1, STAT-6, CCR4, CCR5, CCL4, CCL5, CXCR3, CXCL9, CXCL10, Arg-1, CCL17 and CCL22) was confirmed by RT-PCR in the spleen of (with or with-out 24h of *L. donovani* freeze thaw antigen re-stimulation;  $\pm$  FTAg) of *LmCen*<sup>-/-</sup>-immunized (Imm Chal, n=6) and age matched non-immunized (Non-Imm Chal, n=6) hamsters at 1.5 months of post *L. donovani* needle challenge. The data were normalized to either  $\gamma$ -Actin or 18S expression. Results (mean  $\pm$  SD) are representative of cumulative effect of two independent experiments. Statistical analysis was performed by non-parametric Mann-Whitney two-tailed test.

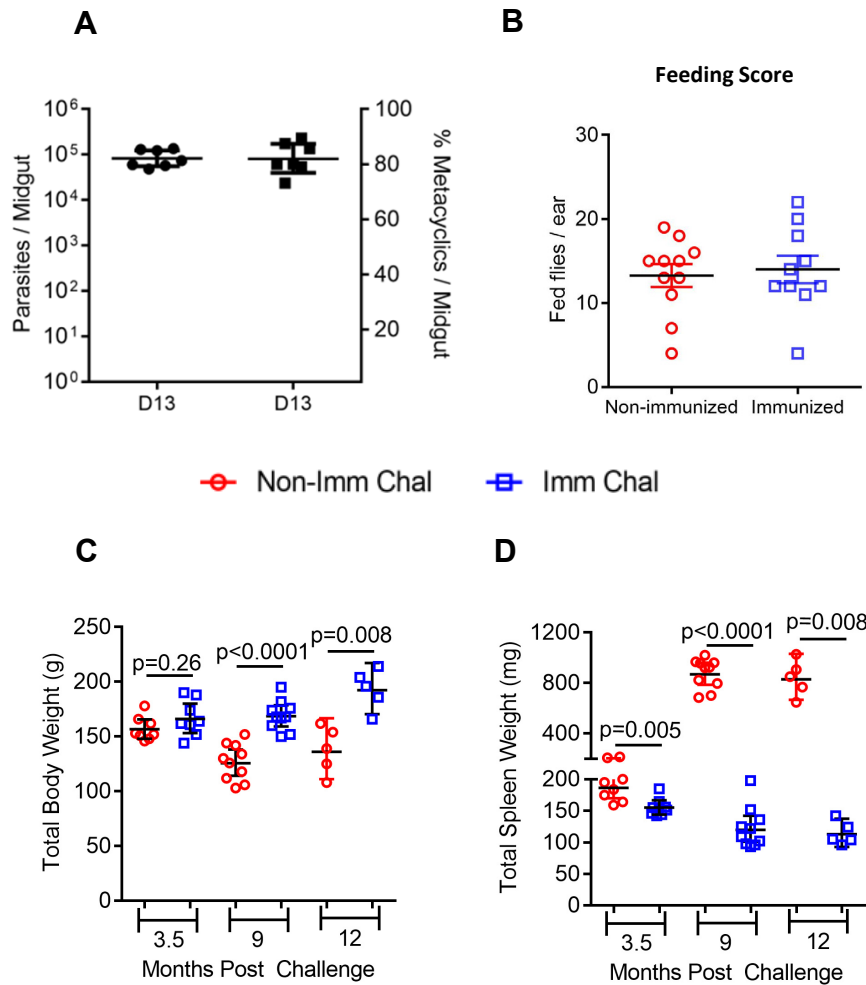

**Supplementary Figure 7: Parasite burden, percent of metacyclic, feeding score of sand flies used for *L. donovani* infection and body and spleen weight of hamsters.**

(A) Assessment of the parasite load and percent metacyclics per sand fly midgut after 13 days of post sand fly infections. For challenge studies, 13 days of post infected sand flies were used. (B) Post transmission feeding score from 30 total sand flies exposed to right ears of each hamster. Data from one of the two independent experiments is shown. (C and D) Body weight (gms) (C) and spleen weight (mg) (D) of *LmCen*<sup>-/-</sup> immunized (Imm Chal) and age matched non-immunized hamsters (Non-Imm chal) were determined after various periods (3.5-, 9- & 12- months) of *L. donovani*-infected sand flies (*Lutzomyia longipalpis*) challenge. Results are representative of cumulative effect of two independent experiments for 3.5 and 9 months post-challenge and one experiment for 12 months post-challenge. Bars represent the geometric means with 95% CI of total 5-10 hamsters (n=8, n=10 and n=5 for 3.5M, 9M and 12M post challenge respectively of non-immunized and immunized challenged groups) in each group are shown. Statistical analysis was performed by non-parametric Mann-Whitney two-tailed test.

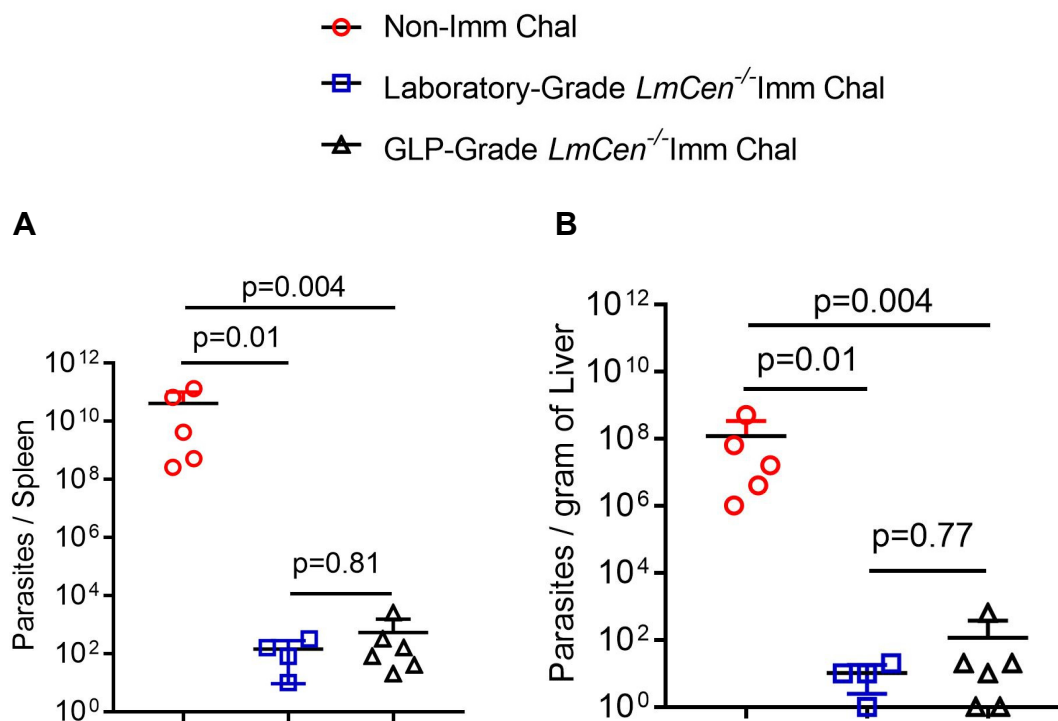

**Supplementary Figure 8: Protective efficacy against *L. donovani* following 9-month post needle challenge.**

(A and B) Parasite loads in the spleen (A) and liver (B) of hamsters either immunized with laboratory-grade (Laboratory-Grade Imm Chal, n=4) or GLP-grade (GLP-Grade Imm Chal, n=6) *LmCen*<sup>-/-</sup> parasites or age matched nonimmunized control (Non-Imm Chal, n=5) were determined by limiting dilution following 9 months of post needle challenge with *L. donovani* and expressed as number of parasites per Spleen and per gram of Liver. Results (Mean ± SD) are representative of one experiment (p values were determined by Mann Whitney two-tailed test).



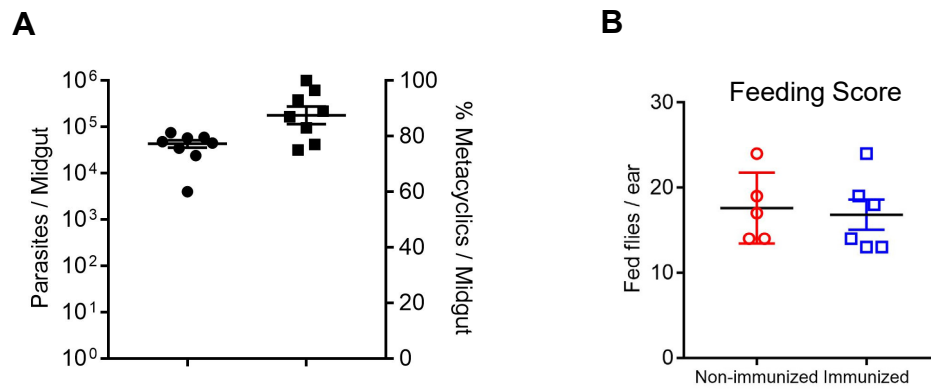

**Supplementary Figure 9: Parasite burden, percent of metacyclic, feeding score of sand flies used for *L. donovani* infection transmitted by sand fly bites.**

(A) Assessment of the parasite load and percent metacyclic per sand fly after 13 days of post sand fly infections. For challenge studies, 13 days of post infected sand flies were used. (B) Post transmission feeding score from 30 total sand flies exposed to right ears of each hamster.

**Supplementary Table 1: Fold change ratio of normalized expression of the genes in spleens of LmCen<sup>-/-</sup> infected hamsters relative to naïve hamsters****LmCen<sup>-/-</sup> versus Naïve**

| ID     | FC ratio | p.value  |                                                                          |
|--------|----------|----------|--------------------------------------------------------------------------|
| IL4    | 2.96625  | 0.000452 |                                                                          |
| IL10   | 6.8075   | 0.000504 |                                                                          |
| IL21   | 7.44125  | 4.23E-05 |                                                                          |
| IL12B  | 183.9775 | 9.16E-12 |                                                                          |
| IFNG   | 45.44    | 8.78E-07 |                                                                          |
| TNFA   | 34.12375 | 0.001605 |                                                                          |
| IL1B   | 16.21875 | 0.000188 |                                                                          |
| IL6    | 4.53875  | 0.003006 |                                                                          |
| TBX21  | 33.91125 | 2.22E-06 | FC ratio is the average of the LmCen <sup>-/-</sup> samples divided by 1 |
| GATA3  | 1.555    | 0.037445 | p.value is calculated by the T.TEST() function with an example below     |
| Foxp3  | 5.53782  | 3.04E-09 | =T.TEST(LmCen <sup>-/-</sup> samples range, Naïve samples range, 2, 2)   |
| Arg1   | 771.9813 | 3.72E-08 |                                                                          |
| CCR4   | 0.42125  | 3.23E-11 | Once uploaded to IPA, use the 'infer observations' button                |
| CCR5   | 5.5875   | 1.06E-06 | Set FC ratio to 'expr ratio' and p.value to 'expr p-value'               |
| CCL4   | 573.0738 | 0.041134 |                                                                          |
| CCL5   | 5.2775   | 0.004234 |                                                                          |
| CCL17  | 24.9695  | 5.35E-05 |                                                                          |
| CCL22  | 311.1659 | 1.72E-09 |                                                                          |
| CXCL9  | 4.7      | 0.038178 |                                                                          |
| CXCL10 | 17.85875 | 4.5E-05  |                                                                          |
| CXCR3  | 5.84375  | 1.01E-05 |                                                                          |
| STAT1  | 6.87875  | 8.8E-09  |                                                                          |
| STAT6  | 6.605    | 0.000106 |                                                                          |

**Fold change ratio of normalized expression of the genes in spleens of LmWT infected hamsters relative to naïve hamsters****LmWT versus naïve**

| ID    | Expr ratio | p.value  |
|-------|------------|----------|
| IL4   | 37.42333   | 0.000151 |
| IL10  | 57.67556   | 3.92E-06 |
| IL21  | 93.33556   | 1E-10    |
| IL12B | 29.78667   | 0.003774 |

|        |          |          |
|--------|----------|----------|
| IFNG   | 17.42333 | 1.7E-05  |
| TNFA   | 11.23667 | 0.000857 |
| IL1B   | 5.277778 | 0.000116 |
| IL6    | 1.453333 | 0.013085 |
| TBX21  | 18.43222 | 0.001836 |
| GATA3  | 3.176667 | 0.002073 |
| Foxp3  | 9.062259 | 1.66E-06 |
| Arg1   | 2158.238 | 7.84E-08 |
| CCR4   | 2.211111 | 0.002066 |
| CCR5   | 9.59     | 1.54E-05 |
| CCL4   | 39.92444 | 0.000201 |
| CCL5   | 0.444444 | 4.38E-05 |
| CCL17  | 161.592  | 8.31E-07 |
| CCL22  | 551.9522 | 9.57E-06 |
| CXCL9  | 0.721111 | 0.294571 |
| CXCL10 | 129.6678 | 0.004595 |
| CXCR3  | 4.531111 | 2.57E-05 |
| STAT1  | 4.134444 | 1.25E-06 |
| STAT6  | 12.34111 | 0.000101 |

**Supplementary Table 2: Upstream regulators predicted by IPA to be activated in LmWT or LmCen<sup>-/-</sup> infected hamster spleens****LmWT**

| Upstream Regulator | Expr Fold Change | Predicted Activation | Activation z-score | p-value of overexpression | Target Molecules in Dataset                                        |
|--------------------|------------------|----------------------|--------------------|---------------------------|--------------------------------------------------------------------|
| CARD9              |                  | Activated            | 2.204              | 8.63E-13                  | IL10,IL12B,IL1B,IL6,TNF                                            |
| GPR84              |                  | Activated            | 2                  | 2.08E-10                  | IL12B,IL1B,IL6,TNF                                                 |
| CLEC6A             |                  | Activated            | 2.216              | 3.44E-15                  | IL10,IL12B,IL1B,IL6,TNF                                            |
| DOCK8              |                  | Activated            | 2.449              | 3.24E-10                  | CCL4,CXCL10,IL12B,IL6,STAT1,TNF                                    |
| IL33               |                  | Activated            | 2.776              | 1.4E-16                   | ARG1,CCL17,IFNG,IL10,IL1B,IL4,IL6,TNF                              |
| CLEC7A             |                  | Activated            | 2.413              | 6.4E-15                   | CCL4,IL10,IL12B,IL1B,IL6,TNF                                       |
| TLR7               |                  | Activated            | 2.865              | 3.09E-16                  | CCL4,CXCL10,IFNG,IL10,IL12B,IL1B,IL6,STAT1,TNF                     |
| REL                |                  | Activated            | 2.209              | 1.94E-13                  | CCL4,CXCL10,FOXP3,IFNG,IL12B,IL1B,IL21,IL4,TNF                     |
| ITGA5              |                  | Activated            | 2                  | 4.46E-11                  | IL12B,IL1B,IL6,TNF                                                 |
| STAT4              |                  | Activated            | 2.557              | 4.3E-13                   | CCR5,IFNG,IL10,IL6,STAT1,TBX21,TNF                                 |
| TLR4               |                  | Activated            | 2.839              | 4.4E-16                   | CCL4,CCL5,CXCL10,IFNG,IL10,IL12B,IL1B,IL4,IL6,STAT1,TNF            |
| ITGB1              |                  | Activated            | 2                  | 6.22E-10                  | IL12B,IL1B,IL6,TNF                                                 |
| TLR2               |                  | Activated            | 2.491              | 4.18E-25                  | ARG1,CCL4,CCL5,CCR5,FOXP3,GATA3,IFNG,IL10,IL12B,IL1B,IL4,IL6,TNF   |
| IRAK4              |                  | Activated            | 2.024              | 4.43E-16                  | IFNG,IL10,IL12B,IL1B,IL4,IL6,TNF                                   |
| STAT6              | 12.341           | Activated            | 2.204              | 1.38E-16                  | ARG1,CCL17,CCR5,GATA3,IFNG,IL10,IL12B,IL4,IL6,STAT6,TBX21,TNF      |
| SAMSN1             |                  | Activated            | 2.449              | 1.23E-09                  | CCL4,CXCL10,IL12B,IL6,STAT1,TNF                                    |
| CDKN2A             |                  | Activated            | 2.044              | 9.84E-18                  | CCL22,CCL4,CCL5,CCR4,CXCL10,IFNG,IL1B,IL6,TNF                      |
| ICOSLG/LOC10272395 |                  | Activated            | 2.194              | 8.63E-13                  | FOXP3,IFNG,IL10,IL4,IL6                                            |
| CSF2               |                  | Activated            | 2.567              | 1.44E-14                  | ARG1,CCL17,CXCL10,IL10,IL12B,IL1B,IL4,IL6,TNF                      |
| CD40LG             |                  | Activated            | 2.703              | 3.46E-16                  | CCL4,CXCL10,IFNG,IL10,IL12B,IL1B,IL6,TNF                           |
| IL2                |                  | Activated            | 2.108              | 5.25E-19                  | CCL4,CCL5,CCR5,CXCR3,FOXP3,GATA3,IFNG,IL10,IL12B,IL4,IL6,TBX21,TNF |
| NOD2               |                  | Activated            | 2.202              | 1.4E-11                   | CXCL10,IL10,IL12B,IL1B,IL6,TNF                                     |
| MYD88              |                  | Activated            | 2.873              | 8.69E-22                  | ARG1,CCL17,CCL4,CCL5,CXCL10,IFNG,IL10,IL12B,IL1B,IL4,IL6,TBX21,TNF |
| SYK                |                  | Activated            | 2.401              | 5.53E-10                  | CCL4,CXCL10,GATA3,IL1B,IL21,TNF                                    |
| PRKCQ              |                  | Activated            | 2.603              | 1.17E-18                  | FOXP3,GATA3,IFNG,IL10,IL4,IL6,TBX21,TNF                            |
| SEPLG              |                  | Activated            | 2                  | 1.19E-07                  | CCL4,IL10,IL1B,STAT6                                               |
| TICAM1             |                  | Activated            | 2.381              | 1.02E-14                  | CCL4,CCL5,CXCL10,IL10,IL12B,IL1B,IL4,IL6,TNF                       |
| MAPKAPK2           |                  | Activated            | 2.156              | 1.26E-09                  | ARG1,CXCL10,IL10,IL6,TNF                                           |
| FCGR2A             |                  | Activated            | 2.605              | 2.5E-15                   | CCL22,CXCL10,IFNG,IL10,IL1B,IL6,TNF                                |
| C3                 |                  | Activated            | 2                  | 3.73E-10                  | CCL4,IFNG,IL10,TNF                                                 |
| GATA3              | 3.177            | Activated            | 2.205              | 8.27E-18                  | CCL4,CCR5,FOXP3,GATA3,IFNG,IL10,IL4,IL6,STAT6,TBX21                |
| IL18               |                  | Activated            | 2.601              | 1.69E-13                  | CCL4,IFNG,IL10,IL1B,IL4,IL6,TNF                                    |
| SASH1              |                  | Activated            | 2.449              | 4.26E-10                  | CCL4,CXCL10,IL12B,IL6,STAT1,TNF                                    |
| ICOS               |                  | Activated            | 2.62               | 9.33E-16                  | GATA3,IFNG,IL10,IL4,IL6,TBX21,TNF                                  |
| TLR9               |                  | Activated            | 2.803              | 3.8E-20                   | CCL4,CCL5,CXCL10,IFNG,IL10,IL12B,IL4,IL6,STAT1,TBX21,TNF           |
| MAP2K3             |                  | Activated            | 2.191              | 1.73E-15                  | CXCL10,IFNG,IL10,IL12B,IL4,STAT1                                   |
| KITLG              |                  | Activated            | 2.433              | 5.94E-12                  | CCL4,IFNG,IL1B,IL4,IL6,TNF                                         |
| NFKB1              |                  | Activated            | 2.158              | 9.84E-18                  | ARG1,CCL17,IFNG,IL10,IL12B,IL1B,IL6,STAT1,TNF                      |
| IL15               |                  | Activated            | 2.931              | 1.24E-13                  | CCL17,CCL4,FOXP3,IFNG,IL10,IL12B,IL6,TBX21,TNF                     |

|                            |        |           |       |          |                                                                                    |
|----------------------------|--------|-----------|-------|----------|------------------------------------------------------------------------------------|
| IFNG                       | 17.423 | Activated | 2.366 | 4.11E-24 | ARG1,CCL4,CCL5,CCR5,CXCL10,FOXP3,IFNG,IL10,IL12B,IL1B,IL21,IL4,IL6,STAT1,TBX21,TNF |
| PRKD1                      |        | Activated | 2.223 | 1.11E-20 | CCL4,CCL5,CXCL10,IL10,IL12B,IL1B,IL6,TNF                                           |
| TNFRSF1A                   |        | Activated | 2.449 | 1.44E-13 | GATA3,IFNG,IL1B,IL4,IL6,TBX21                                                      |
| FCER1G                     |        | Activated | 2.169 | 1.58E-12 | IL10,IL12B,IL1B,IL6,TNF                                                            |
| IL1B                       | 5.278  | Activated | 2.198 | 1.83E-18 | CCL4,CCL5,IFNG,IL10,IL12B,IL1B,IL6,TBX21,TNF                                       |
| Klrk1                      |        | Activated | 2.009 | 8.55E-17 | CCL4,CCL5,CCR5,IFNG,IL10,STAT1,TBX21,TNF                                           |
| PF4                        |        | Activated | 2.398 | 2.76E-13 | CCL22,CCL4,IFNG,IL1B,IL6,TNF                                                       |
| EBI3                       |        | Activated | 2.207 | 1.58E-12 | IFNG,IL10,IL21,IL4,TBX21                                                           |
| CD28                       |        | Activated | 3.37  | 4.66E-27 | CCL4,CCR4,CCR5,CXCR3,FOXP3,GATA3,IFNG,IL10,IL1B,IL21,IL4,IL6,STAT6,TBX21,TNF       |
| TLR3                       |        | Activated | 2.026 | 1.16E-15 | CCL5,CXCL10,IFNG,IL10,IL12B,IL1B,IL6,STAT1,TNF                                     |
| <b>LmCen<sup>-/-</sup></b> |        |           |       |          |                                                                                    |
| CARD9                      |        | Activated | 2.204 | 1.1E-12  | IL10,IL12B,IL1B,IL6,TNF                                                            |
| GPR84                      |        | Activated | 2     | 2.51E-10 | IL12B,IL1B,IL6,TNF                                                                 |
| RNASE2                     |        | Activated | 2.951 | 7.08E-21 | CCL22,CCL4,CCL5,CXCL10,CXCL9,IL10,IL12B,IL6,TNF                                    |
| CLEC6A                     |        | Activated | 2.216 | 4.4E-15  | IL10,IL12B,IL1B,IL6,TNF                                                            |
| DOCK8                      |        | Activated | 2.449 | 4.36E-10 | CCL4,CXCL10,IL12B,IL6,STAT1,TNF                                                    |
| IL33                       |        | Activated | 2.776 | 2.14E-16 | ARG1,CCL17,IFNG,IL10,IL1B,IL4,IL6,TNF                                              |
| MAVS                       |        | Activated | 2.592 | 1.43E-14 | CCL5,CXCL10,IFNG,IL1B,IL6,STAT1,TNF                                                |
| STING1                     |        | Activated | 2.216 | 8.62E-10 | CCL5,CXCL10,IL1B,IL6,TNF                                                           |
| CLEC7A                     |        | Activated | 2.413 | 8.66E-15 | CCL4,IL10,IL12B,IL1B,IL6,TNF                                                       |
| TLR7                       |        | Activated | 3.018 | 2.92E-18 | CCL4,CXCL10,CXCL9,IFNG,IL10,IL12B,IL1B,IL6,STAT1,TNF                               |
| STAT1                      | 6.879  | Activated | 2.358 | 8.37E-26 | CCL5,CXCL10,CXCL9,CXCR3,FOXP3,GATA3,IFNG,IL10,IL1B,IL21,IL6,TBX21,TNF              |
| REL                        |        | Activated | 2.209 | 3.17E-13 | CCL4,CXCL10,FOXP3,IFNG,IL12B,IL1B,IL21,IL4,TNF                                     |
| ITGA5                      |        | Activated | 2     | 5.4E-11  | IL12B,IL1B,IL6,TNF                                                                 |
| STAT4                      |        | Activated | 2.557 | 6.17E-13 | CCR5,IFNG,IL10,IL6,STAT1,TBX21,TNF                                                 |
| TLR4                       |        | Activated | 3.054 | 8.35E-16 | CCL4,CCL5,CXCL10,IFNG,IL10,IL12B,IL1B,IL4,IL6,STAT1,TNF                            |
| ITGB1                      |        | Activated | 2     | 7.53E-10 | IL12B,IL1B,IL6,TNF                                                                 |
| AKT1                       |        | Activated | 2.449 | 6.22E-14 | CCL5,CXCL10,FOXP3,IL10,IL6,STAT6                                                   |
| TLR2                       |        | Activated | 3.071 | 9.59E-25 | ARG1,CCL4,CCL5,CCR5,FOXP3,GATA3,IFNG,IL10,IL12B,IL1B,IL4,IL6,TNF                   |
| CD14                       |        | Activated | 2.57  | 6.07E-18 | CCL4,CCL5,CXCL10,IFNG,IL10,IL1B,IL6,TNF                                            |
| IRAK4                      |        | Activated | 2.024 | 6.36E-16 | IFNG,IL10,IL12B,IL1B,IL4,IL6,TNF                                                   |
| STAT6                      | 6.605  | Activated | 2.204 | 2.84E-16 | ARG1,CCL17,CCR5,GATA3,IFNG,IL10,IL12B,IL4,IL6,STAT6,TBX21,TNF                      |
| SAMSN1                     |        | Activated | 2.449 | 1.66E-09 | CCL4,CXCL10,IL12B,IL6,STAT1,TNF                                                    |
| CDKN2A                     |        | Activated | 2.044 | 1.61E-17 | CCL22,CCL4,CCL5,CCR4,CXCL10,IFNG,IL1B,IL6,TNF                                      |
| ICOSLG/LOC10272399         |        | Activated | 2.194 | 1.1E-12  | FOXP3,IFNG,IL10,IL4,IL6                                                            |
| CSF2                       |        | Activated | 2.567 | 2.35E-14 | ARG1,CCL17,CXCL10,IL10,IL12B,IL1B,IL4,IL6,TNF                                      |
| CD40LG                     |        | Activated | 2.703 | 5.29E-16 | CCL4,CXCL10,IFNG,IL10,IL12B,IL1B,IL6,TNF                                           |
| NOD2                       |        | Activated | 2.202 | 1.89E-11 | CXCL10,IL10,IL12B,IL1B,IL6,TNF                                                     |
| S100A8                     |        | Activated | 2.196 | 2.69E-11 | CXCL10,CXCL9,IL1B,IL6,TNF                                                          |
| MYD88                      |        | Activated | 3.083 | 1.98E-21 | ARG1,CCL17,CCL4,CCL5,CXCL10,IFNG,IL10,IL12B,IL1B,IL4,IL6,TBX21,TNF                 |
| SYK                        |        | Activated | 2.401 | 7.46E-10 | CCL4,CXCL10,GATA3,IL1B,IL21,TNF                                                    |
| PRKCQ                      |        | Activated | 2.603 | 1.8E-18  | FOXP3,GATA3,IFNG,IL10,IL4,IL6,TBX21,TNF                                            |

|          |                  |       |          |                                                                                          |
|----------|------------------|-------|----------|------------------------------------------------------------------------------------------|
| SELPLG   | Activated        | 2     | 1.43E-07 | CCL4,IL10,IL1B,STAT6                                                                     |
| TICAM1   | Activated        | 2.381 | 1.66E-14 | CCL4,CCL5,CXCL10,IL10,IL12B,IL1B,IL4,IL6,TNF                                             |
| MAPKAPK2 | Activated        | 2.156 | 1.61E-09 | ARG1,CXCL10,IL10,IL6,TNF                                                                 |
| FCGR2A   | Activated        | 2.605 | 3.58E-15 | CCL22,CXCL10,IFNG,IL10,IL1B,IL6,TNF                                                      |
| C3       | Activated        | 2     | 4.52E-10 | CCL4,IFNG,IL10,TNF                                                                       |
| RNASE1   | Activated        | 2.8   | 1.15E-18 | CCL22,CCL4,CCL5,CXCL10,CXCL9,IL12B,IL6,TNF                                               |
| GATA3    | 1.555 Activated  | 2.205 | 1.46E-17 | CCL4,CCR5,FOXP3,GATA3,IFNG,IL10,IL4,IL6,STAT6,TBX21                                      |
| CCL5     | 5.277 Activated  | 2.2   | 6.48E-09 | CCL4,CCL5,IL1B,IL6,TNF                                                                   |
| IL18     | Activated        | 2.601 | 2.43E-13 | CCL4,IFNG,IL10,IL1B,IL4,IL6,TNF                                                          |
| PTGS2    | Activated        | 2.233 | 8.72E-12 | CCL5,CXCL10,IL1B,IL6,TNF                                                                 |
| TRIM24   | Activated        | 2.219 | 2.02E-12 | CCL4,CCL5,IL10,IL21,IL4                                                                  |
| SASH1    | Activated        | 2.449 | 5.74E-10 | CCL4,CXCL10,IL12B,IL6,STAT1,TNF                                                          |
| ICOS     | Activated        | 2.62  | 1.34E-15 | GATA3,IFNG,IL10,IL4,IL6,TBX21,TNF                                                        |
| TLR9     | Activated        | 3.342 | 3.42E-22 | CCL4,CCL5,CXCL10,CXCL9,IFNG,IL10,IL12B,IL4,IL6,STAT1,TBX21,TNF                           |
| IRF3     | Activated        | 2.2   | 3.13E-09 | CCL5,CXCL10,IL10,IL4,STAT1,TNF                                                           |
| MAP2K3   | Activated        | 2.401 | 1.82E-18 | CXCL10,CXCL9,IFNG,IL10,IL12B,IL4,STAT1                                                   |
| KITLG    | Activated        | 2.433 | 8.02E-12 | CCL4,IFNG,IL1B,IL4,IL6,TNF                                                               |
| TLR6     | Activated        | 2.588 | 9.46E-18 | CCL5,IFNG,IL12B,IL1B,IL4,IL6,TNF                                                         |
| NFKB1    | Activated        | 2.158 | 1.61E-17 | ARG1,CCL17,IFNG,IL10,IL12B,IL1B,IL6,STAT1,TNF                                            |
| IL15     | Activated        | 2.931 | 2.02E-13 | CCL17,CCL4,FOXP3,IFNG,IL10,IL12B,IL6,TBX21,TNF                                           |
| IFNG     | 45.44 Activated  | 3.185 | 9.29E-26 | ARG1,CCL4,CCL5,CCR5,CXCL10,CXCL9,FOXP3,IFNG,IL10,IL12B,IL1B,IL21,IL4,IL6,STAT1,TBX21,TNF |
| PRKD1    | Activated        | 2.804 | 1.7E-20  | CCL4,CCL5,CXCL10,IL10,IL12B,IL1B,IL6,TNF                                                 |
| TNFRSF1A | Activated        | 2.449 | 1.94E-13 | GATA3,IFNG,IL1B,IL4,IL6,TBX21                                                            |
| BCL10    | Activated        | 2.195 | 1.1E-12  | CCL4,CCL5,IFNG,IL6,TNF                                                                   |
| BECN1    | Activated        | 2.208 | 2.02E-12 | CCL5,IL12B,IL1B,IL6,TNF                                                                  |
| FCER1G   | Activated        | 2.169 | 2.02E-12 | IL10,IL12B,IL1B,IL6,TNF                                                                  |
| IL1B     | 16.219 Activated | 2.758 | 3.01E-18 | CCL4,CCL5,IFNG,IL10,IL12B,IL1B,IL6,TBX21,TNF                                             |
| Klrk1    | Activated        | 2.783 | 1.31E-16 | CCL4,CCL5,CCR5,IFNG,IL10,STAT1,TBX21,TNF                                                 |
| PF4      | Activated        | 2.398 | 3.73E-13 | CCL22,CCL4,IFNG,IL1B,IL6,TNF                                                             |
| EBI3     | Activated        | 2.207 | 2.02E-12 | IFNG,IL10,IL21,IL4,TBX21                                                                 |
| CD28     | Activated        | 3.37  | 1.33E-26 | CCL4,CCR4,CCR5,CXCR3,FOXP3,GATA3,IFNG,IL10,IL1B,IL21,IL4,IL6,STAT6,TBX21,TNF             |
| TLR3     | Activated        | 2.755 | 1.9E-15  | CCL5,CXCL10,IFNG,IL10,IL12B,IL1B,IL6,STAT1,TNF                                           |

**Supplementary Table 3 : Quality attributes and acceptance criteria for lot to lot consistency of GLP-grade *LmCen*<sup>-/-</sup> parasites**

| Quality Attribute                    | Acceptance criteria                                                                                                                                                                                                                  |
|--------------------------------------|--------------------------------------------------------------------------------------------------------------------------------------------------------------------------------------------------------------------------------------|
| <b>Physical Attributes</b>           |                                                                                                                                                                                                                                      |
| <b>Morphology</b>                    | Ovoid cell body with a highly motile long flagellum                                                                                                                                                                                  |
| <b>Identification</b>                |                                                                                                                                                                                                                                      |
| <b>Absence of Centrin gene</b>       | PCR test negative & NGS analysis confirmed deletion of Centrin1 gene from the genome                                                                                                                                                 |
| <b>Purity</b>                        |                                                                                                                                                                                                                                      |
| <b>Test of sterility</b>             | As recommended by the USP<br><br>( <a href="https://www.uspnf.com/sites/default/files/usp_pdf/EN/USPNF/revi-sions/gc_1_rb_notice.pdf">https://www.uspnf.com/sites/default/files/usp_pdf/EN/USPNF/revi-sions/gc_1_rb_notice.pdf</a> ) |
| <b>Stability</b>                     | One-month post-cryo at Liquid N2: 70-75% viability<br><br>12-months post-cryo in Liquid N2: 70-75% viability                                                                                                                         |
| <b>Potency</b>                       |                                                                                                                                                                                                                                      |
| <b>Macrophage Infection Assay</b>    | <20-30% parasite survival after 120 hours of infection in THP1 cell line                                                                                                                                                             |
| <b>Immune response</b>               | TNF-a (1500-2000pg/mL)                                                                                                                                                                                                               |
| <b>% of metacyclic promastigotes</b> | 30-50%                                                                                                                                                                                                                               |
| <b>Content</b>                       |                                                                                                                                                                                                                                      |
| <b>Parasite content</b>              | 10 <sup>7</sup> parasites/mL in 1.8mL per vial                                                                                                                                                                                       |

**Supplementary Table 4: Composition of cultivation medium of GLP-grade *LmCen*<sup>-/-</sup> parasites in Bioreactor**

| S. N. | Medium component | Stock concentration | Quantity/L |
|-------|------------------|---------------------|------------|
| 1     | M 199            | 1 X                 | 858 ml     |
| 2     | PenStrep         | 100 X               | 10 ml      |
| 3     | HEPES            | 1 M                 | 25 ml      |
| 4     | Hemin            | 5 g/L               | 2 ml       |
| 5     | Adenosine        | 25 mM               | 4 ml       |
| 6     | FBS (10% v/v)    | -                   | 100 ml     |
| 7     | Folic acid       | 10 g/L              | 1 ml       |
| 8     | Biotin           | 200mg/L             | 5 ml       |

**Supplementary Table 5: Composition of Cryo-medium for GLP-grade *LmCen*<sup>-/-</sup> parasites stored in liquid nitrogen**

| S. N. | Medium component | Stock concentration | Quantity/L |
|-------|------------------|---------------------|------------|
| 1     | M 199            | 1 X                 | 858 ml     |
| 2     | PenStrep         | 100 X               | 10 ml      |
| 3     | HEPES            | 1 M                 | 25 ml      |
| 4     | Hemin            | 5 g/L               | 2 ml       |
| 5     | Adenosine        | 25 mM               | 4 ml       |
| 6     | FBS (10% v/v)    | -                   | 100 ml     |
| 7     | Folic acid       | 10 g/L              | 1 ml       |
| 8     | Biotin           | 200mg/L             | 5 ml       |
| 9     | Glycerol (v/v)   | -                   | 10%        |



**Supplementary Table 6: Primers and probe sequences used for the immunological analysis in hamsters**

| <b>Hamster target gene</b>       | <b>Primers and probes sequences</b> |                                                   |
|----------------------------------|-------------------------------------|---------------------------------------------------|
| <b>IL-12p40</b>                  | Forward                             | 5'-AATGCGAGGCAGCAAATTACTC-3'                      |
|                                  | Reverse                             | 5'-CTGCTCTTGACGTTGAACTTCAAG-3'                    |
|                                  | Probe                               | 5'-(6FAM)-CCTGCTGGTGGCTGACTGCAATCA-(TAMRA)-3'     |
| <b>IFN-<math>\gamma</math></b>   | Forward                             | 5'-TGTTGCTCTGCCTCACTCAGG-3'                       |
|                                  | Reverse                             | 5'-AAGACGAGGTCCCCTCCATTC-3'                       |
|                                  | Probe                               | 5'-(6FAM) TGGCTGCTACTGCCAGGGCACACTC-(TAMRA)-3'    |
| <b>TNF-<math>\alpha</math></b>   | Forward                             | 5'-TGAGCCATCGTGCCAATG-3'                          |
|                                  | Reverse                             | 5'-AGCCCGTCTGCTGGTATCAC-3'                        |
|                                  | Probe                               | 5'-(6FAM)-CGGCATGTCTCTCAAAGACAACCAG-(TAMRA)-3'    |
| <b>IL-4</b>                      | Forward                             | 5'-ACAGAAAAGGGACACCATGCA-3'                       |
|                                  | Reverse                             | 5'-GAAGCCCTGCAGATGAGGTCT-3'                       |
|                                  | Probe                               | 5'-(6FAM) AGACGCCCTTTCAGCAAGGAAGAACTCC-(TAMRA)-3' |
| <b>IL-10</b>                     | Forward                             | 5'-GGTTGCCAAACCTTATCAGAAATG-3'                    |
|                                  | Reverse                             | 5'-TTCACCTGTTCCACAGCCTTG-3'                       |
|                                  | Probe                               | 5'-(6FAM) TGCAGCGCTGTCATCGATTTCTCCC-(TAMRA)-3'    |
| <b>IL-21</b>                     | Forward                             | 5'-GGACAGTGGCCCATAAAACAAG-3'                      |
|                                  | Reverse                             | 5'-TTCAACACTGTCTATAAGATGACGAAGTC-3'               |
|                                  | Probe                               | 5'-(6FAM)-CAAGGGCCAGATCGCCTCCTGATT-(TAMRA)-3'     |
| <b>CCL17</b>                     | Forward                             | 5'-GTGCTGCCTGGAGATCTTCA-3'                        |
|                                  | Reverse                             | 5'-TGGCATCCCTGGGACACT3'                           |
|                                  | Probe                               | 5'-(6FAM)-CCATTCCCATCAGGAAGCTGGTGATG-(TAMRA)-3'   |
| <b>CCL22</b>                     | Forward                             | 5'-TGGTGCCAACGTGGAAGAC-3'                         |
|                                  | Reverse                             | 5'-GAAGAACTCCTTCACTACGCGC-3'                      |
|                                  | Probe                               | 5'-(6FAM)-CTGCTGCCAGGACTACATCCGTCAGC-(TAMRA)-3'   |
| <b><math>\gamma</math>-actin</b> | Forward                             | 5'-ACAGAGAGAAGATGACGCAGATAATG-3'                  |
|                                  | Reverse                             | 5'-GCCTGAATGGCCACGTACA-3'                         |
|                                  | Probe                               | 5'-VIC -TTGAAACCTTCAACACCCCAGCC-(TAMRA)-3'        |

Supplementary Table 6 : Primers and probe sequences (continues)

| Hamster target gene           | Primers and probes sequences |                                  |
|-------------------------------|------------------------------|----------------------------------|
| <b>IL-1<math>\beta</math></b> | Forward                      | 5' –GGCTGATGCTCCCATTCG– 3'       |
|                               | Reverse                      | 5' –CACGAGGCATTTCTGTTGTTCA– 3'   |
| <b>IL-6</b>                   | Forward                      | 5' –CCTGAAAGCACTTGAAGAATTCC– 3'  |
|                               | Reverse                      | 5' –GGTATGCTAAGGCACAGCACACT– 3'  |
| <b>T-bet</b>                  | Forward                      | 5' –ACAAGGGGGCTTCCAACAAT– 3'     |
|                               | Reverse                      | 5' –CAGCTGAGTGATCTCGGCAT– 3'     |
| <b>GATA3</b>                  | Forward                      | 5' –GAAGGCAGGGAGTGTGTGAA – 3'    |
|                               | Reverse                      | 5' –GTCTGACAGTTCGCACAGGA– 3'     |
| <b>CXCR3</b>                  | Forward                      | 5' –CAAGTGCCAAAGCAGAGAAGC– 3'    |
|                               | Reverse                      | 5' –CAAAGTCCGAGGCATCTAGCA– 3'    |
| <b>CXCL9</b>                  | Forward                      | 5'-TGGGTATCATCCTCCTGGAC-3'       |
|                               | Reverse                      | 5'-AATGAGGACCTGGAGCAAAC-3'       |
| <b>CXCL10</b>                 | Forward                      | 5'-TGGAATTATTCTCTGCAAGTCA-3'     |
|                               | Reverse                      | 5'-GTGATCGGCTTCTCTCTGGT-3'       |
| <b>CCR4</b>                   | Forward                      | 5' –GCTTGGTCACGTGGTCAGTG– 3'     |
|                               | Reverse                      | 5' –GTGGTTGCGCTCCGTGTAG– 3'      |
| <b>CCR5</b>                   | Forward                      | 5' –TGTGACATCCGTTCCCCCT– 3'      |
|                               | Reverse                      | 5' –GGCAGGGTGCTGACATACTA– 3'     |
| <b>CCL4</b>                   | Forward                      | 5' –TCTCTCTCCTCCTGTTCTGGTGG– 3'  |
|                               | Reverse                      | 5' –TTTGCTTGCCTTTTCTGGTCA– 3'    |
| <b>CCL5</b>                   | Forward                      | 5' –CTACGCTCCTTCATCTGCCTC– 3'    |
|                               | Reverse                      | 5' –CCTTCGGGTGACAAAAACGAC– 3'    |
| <b>STAT1</b>                  | Forward                      | 5' –GCCAACGATGATTCCTTTGC– 3'     |
|                               | Reverse                      | 5' –GCTATATTGGTCATCCAGCTGAGA– 3' |
| <b>STAT6</b>                  | Forward                      | 5' –GAAGCACCACTTTGCAACACA– 3'    |
|                               | Reverse                      | 5' –GGCAGGTGACGGAACCTTTCT– 3'    |
| <b>FOXP3</b>                  | Forward                      | 5' –AGGTCTTCGAGGAGCCAGAA– 3'     |
|                               | Reverse                      | 5' –GCCTTGCCCTTCTCATCCA– 3'      |
| <b>Arginase-1</b>             | Forward                      | 5'-ACCTATGTGTCATTTGGGTGGA-3'     |
|                               | Reverse                      | 5'-GCAGATATGCAGGGAGTCACC-3'      |
| <b>18s</b>                    | Forward                      | 5'-ACCGCAGCTAGGAATAATGGA-3'      |
|                               | Reverse                      | 5'-GCCTCAGTTCCGAAAACCA-3'        |
